# Supplementary material for: SERBP1 affects the apoptotic level by regulating the expression and alternative splicing of cellular and metabolic process genes in HeLa cells
Source: PeerJ journal article supplement (doi:10.7717/peerj.14084), 2022-10-03

A

Up KEGG pathway

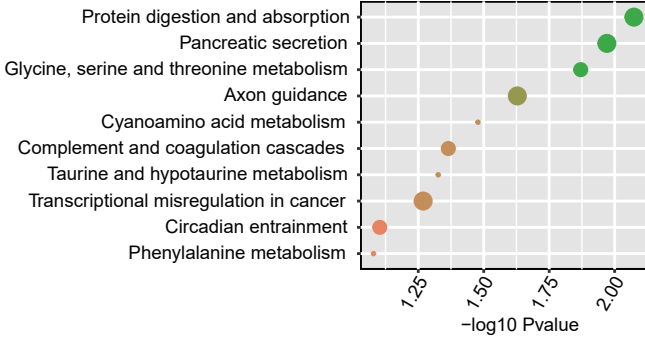

B

Down KEGG pathway

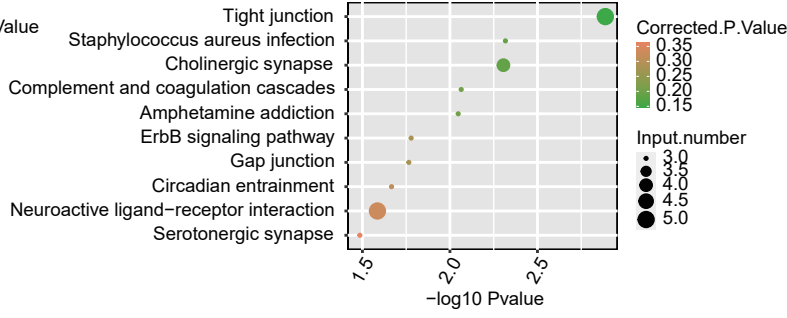

Supplement: FigS3.pdf [file FigS3.pdf]
