# Supplementary material for: SERBP1 affects the apoptotic level by regulating the expression and alternative splicing of cellular and metabolic process genes in HeLa cells
Source: PeerJ. 2022 Oct 3;10:e14084. doi: 10.7717/peerj.14084 (PMC9536300; doi:10.7717/peerj.14084)
Supplement: Supplemental Information 5 [file peerj-10-14084-s005.xlsx]

## Sheet: RT-QPCR raw data
Sample	Ct (SERBP1)	Ct（GAPDH）	Ct mean	△ct(-)		2-△ct	2-△△ct	Sd	RQ1
E138 NC-1	23.2912	20.4979	20.7375	-2.55373		0.170314	0.96011	0.044474	1
	23.1649	20.6208		-2.42742		0.185897	1.04795
	23.2441	21.0936		-2.50668		0.17596	0.991936
E138 NC-2	22.5439	19.1925	19.2903	-3.25361		0.104849	0.591065	0.325678	0.867897
	21.4904	18.983		-2.20017		0.217612	1.22674
	22.1329	19.6953		-2.84261		0.139408	0.785884
E138 OE-1	14.8921	19.5555	19.7427	4.85056		28.8512	162.643	21.6121	146.209
	14.9685	19.8856		4.7742		27.3638	154.258
	15.3102	19.787		4.43252		21.5934	121.728
E138 OE-2	14.9062	19.5422	20.0295	5.1233		34.855	196.488	43.8273	149.965
	15.3551	19.6604		4.67446		25.536	143.954
	15.7504	20.886		4.27918		19.4161	109.454
Sample	Mean	SE	SD	Pvalue
Con	0.933948	0.0668096	0.163649	1.94911e-07	***
SERBP1	148.087	9.40689	23.0421

## Sheet: SERBP1 in CRC
	HCEC			SW480			COLO205			HCT-8			WiDr			RKO			SW620			HT29			HCT-15			HCT116			LOVO			HEK293T
SERBP1	1.00928	0.99539	0.99539	1.72657	1.88937	1.88937	2.24788	2.27926	2.24788	2.45293	2.47	2.50447	2.81561	2.77685	2.70091	3.6685	3.49476	3.618	3.52318	3.59721	3.59721	4.23557	4.50822	4.35465	4.16928	4.02726	4.16928	4.84632	4.94815	4.61679	5.34418	5.2706	5.34418	10.3184	10.4624	10.6823

## Sheet: SERBP1 in HCC
LO2		PLC		SNU449		SNU423		SNU475		SNU387
1		1.512	0.5864	1.116	0.1117	0.6422	0.0504	1.13	0.0809	1.215	0.0689
