# Supplementary material for: SERBP1 affects the apoptotic level by regulating the expression and alternative splicing of cellular and metabolic process genes in HeLa cells
Source: PeerJ. 2022 Oct 3;10:e14084. doi: 10.7717/peerj.14084 (PMC9536300; doi:10.7717/peerj.14084)
Supplement: Supplemental Information 6 [file peerj-10-14084-s006.xlsx]

## Sheet: DEG
Table S3. The DEG table between SERBP1-OE vs. Ctrl.
Gene	logFC	logCPM	PValue	FDR	Ctrl_1st	Ctrl_2nd	Serbp1_1st	Serbp1_2nd	Symbol	Description
ENSG00000230747.1	-3.13272	-2.30524	0.00029183	0.0178862	0.48	0.14	0.03	0.03	AC021188.4		--
ENSG00000260691.5	2.01123	-1.51873	0.000130574	0.0108727	0.01	0.05	0.11	0.12	ANKRD20A1	ankyrin repeat domain 20 family, member A1
ENSG00000166866.12	-1.13727	1.39299	4.56046e-08	2.96026e-05	0.93	0.74	0.36	0.39	MYO1A	myosin IA
ENSG00000266965.1	5.81264	-2.70336	0.000146972	0.0114378	0	0	0.1	0.1	RP11-712P20.2		--
ENSG00000223711.1	-2.04774	-1.05276	6.95934e-06	0.00142997	0.78	0.7	0.18	0.17	AC091633.3		--
ENSG00000100626.16	-1.93248	-1.48686	0.000201186	0.0140796	0.04	0.09	0.03	0.01	GALNT16	polypeptide N-acetylgalactosaminyltransferase 16
ENSG00000248873.1	6.38893	-2.30511	1.45501e-06	0.000431112	0	0	0.26	0.27	SERBP1P6	SERPINE1 mRNA binding protein 1 pseudogene 6
ENSG00000260805.2	-1.43962	-0.196912	6.46385e-06	0.00137724	0.66	0.43	0.2	0.2	RP11-61J19.5		--
ENSG00000274897.2	-1.60684	-1.1624	0.00048852	0.0255542	0.36	0.24	0.1	0.1	PANO1	proapoptotic nucleolar protein 1
ENSG00000131067.16	3.47378	-2.63892	0.00114643	0.0440959	0	0.01	0.07	0.05	GGT7	gamma-glutamyltransferase 7
ENSG00000088002.11	-3.98278	-2.35397	5.46151e-05	0.00590856	0.12	0.15	0	0.01	SULT2B1	sulfotransferase family, cytosolic, 2B, member 1
ENSG00000266306.1	-1.57239	-0.732082	2.71293e-05	0.00392568	0.33	0.68	0.08	0.24	CTD-2008P7.6		--
ENSG00000171557.16	-1.48672	-1.07441	0.000819251	0.036109	0.27	0.24	0.05	0.13	FGG	fibrinogen gamma chain
ENSG00000281333.1	-2.30795	-1.91306	0.000476899	0.0250381	0.52	0.73	0.05	0.19	RP11-900F13.3		--
ENSG00000275221.1	-1.28185	1.45287	5.14078e-10	6.99171e-07	6.99	9.86	3.01	3.84	HIST1H2AK	histone cluster 1, H2ak
ENSG00000183801.7	-1.23358	-0.294167	0.000147418	0.0114413	0.42	0.21	0.09	0.18	OLFML1	olfactomedin-like 1
ENSG00000147697.8	1.25004	-0.320933	0.000123069	0.0104906	0.22	0.06	0.29	0.37	GSDMC	gasdermin C
ENSG00000256973.1	-1.09945	-0.34068	0.000674713	0.0313341	1.14	1.22	0.46	0.63	RP11-359J14.2		--
ENSG00000249094.2	-4.05745	-2.3025	2.96451e-05	0.00411061	0.23	0.46	0	0.03	RP1-7G5.6		--
ENSG00000156475.18	-1.00534	1.35316	1.41121e-06	0.000431112	0.28	0.21	0.11	0.13	PPP2R2B	protein phosphatase 2, regulatory subunit B, beta
ENSG00000258791.7	2.64188	-1.87761	5.63083e-05	0.00597852	0.03	0.01	0.18	0.1	LINC00520	long intergenic non-protein coding RNA 520
ENSG00000279571.1	-1.14622	-0.160806	0.000196188	0.0140083	1.36	1.35	0.59	0.63	RP11-56D16.8		--
ENSG00000279527.1	-6.21144	-2.46068	1.03982e-05	0.00191603	0.37	0.51	0	0	RP11-83B20.2		--
ENSG00000262587.2	-1.06527	-0.0764955	0.000445992	0.0237701	1.19	0.66	0.43	0.45	RP11-266L9.4		--
ENSG00000275367.1	-2.67959	-2.20731	0.000644364	0.0305487	0.07	0.08	0.01	0.01	RP11-266K4.14		--
ENSG00000274184.1	5.59493	-2.84058	0.000558963	0.0276203	0	0	0.1	0.05	RP11-158H5.8		--
ENSG00000181126.13	1.40849	-0.548592	7.1752e-05	0.00721977	0.05	0.05	0.15	0.13	HLA-V	major histocompatibility complex, class I, V (pseudogene)
ENSG00000125378.15	1.17393	-0.547733	0.00123569	0.0460547	0.15	0.17	0.44	0.28	BMP4	bone morphogenetic protein 4
ENSG00000270120.1	-5.95193	-2.63785	7.55825e-05	0.00721977	0.22	0.28	0	0	RP11-327F22.6		--
ENSG00000272949.1	1.36325	0.961718	5.61859e-09	5.17654e-06	0.18	0.33	0.71	0.6	RP11-514P8.8		--
ENSG00000213638.5	1.28905	0.186571	5.37461e-06	0.00120344	0.29	0.38	1.04	0.59	ADAT3	adenosine deaminase, tRNA-specific 3
ENSG00000270558.1	1.18158	0.200193	2.09363e-05	0.00323222	1.29	0.87	1.92	2.99	CTD-2124B8.2		--
ENSG00000278189.1	-2.68613	-2.20424	0.000378225	0.0211636	0	3.35	0	0.46	RNA5-8S5	RNA, 5.8S ribosomal 5
ENSG00000275092.1	1.24427	-0.653264	0.00101419	0.0424103	0.2	0.64	1.14	0.8	LA16c-329F2.2		--
ENSG00000230042.1	1.20811	-0.737873	0.00129742	0.0476291	0.49	0.35	0.87	1.08	AK3P3	adenylate kinase 3 pseudogene 3
ENSG00000221955.10	-1.41768	1.29119	5.77264e-11	1.03045e-07	1.24	0.38	0.15	0.45	SLC12A8	solute carrier family 12, member 8
ENSG00000201217.1	2.135	-1.43534	3.39891e-05	0.00455757	1.04	0.68	4.49	3.29	Y_RNA		--
ENSG00000144596.11	-1.04497	1.7212	6.14574e-08	3.44174e-05	0.53	0.42	0.23	0.22	GRIP2	glutamate receptor interacting protein 2
ENSG00000085552.16	3.20046	-2.20807	9.33425e-05	0.00854473	0	0.01	0.08	0.04	IGSF9	immunoglobulin superfamily, member 9
ENSG00000270720.1	3.98183	-2.30409	2.96451e-05	0.00411061	0	0.04	0.7	0.12	RP11-84C13.2		--
ENSG00000251031.1	5.47159	-2.91481	0.00109327	0.0431463	0	0	0.25	0.28	CTC-367F4.1		--
ENSG00000238287.1	-1.34631	-0.880504	0.000592289	0.0288675	1.55	0.42	0.08	0.69	RP11-656D10.3		--
ENSG00000005102.12	-1.13757	0.205925	4.62484e-05	0.00544338	0.47	0.5	0.16	0.27	MEOX1	mesenchyme homeobox 1
ENSG00000257576.1	2.85946	-2.03283	7.51226e-05	0.00721977	0	0.05	0.23	0.11	RP11-153M3.1		--
ENSG00000144712.11	5.91057	-2.63921	7.55825e-05	0.00721977	0	0	0.04	0.03	CAND2	cullin-associated and neddylation-dissociated 2 (putative)
ENSG00000227627.1	-1.22764	-0.340163	0.000163494	0.0122883	1.24	1.47	0.4	0.74	RP1-101K10.6		--
ENSG00000111344.11	-3.5458	-2.63944	0.00114643	0.0440959	0.06	0.02	0	0.01	RASAL1	RAS protein activator like 1 (GAP1 like)
ENSG00000136274.8	-1.04667	0.00488849	0.000405972	0.0221667	0.31	0.15	0.09	0.13	NACAD	NAC alpha domain containing
ENSG00000274428.1	-5.63414	-2.84043	0.000558963	0.0276203	1.17	0.64	0	0	U1		--
ENSG00000137745.11	-2.23776	-1.57658	8.03335e-05	0.00762261	0.15	0.14	0.03	0.03	MMP13	matrix metallopeptidase 13
ENSG00000256742.1	-1.61251	-1.25229	0.000532932	0.0271805	0.56	1.23	0.22	0.34	RP13-941N14.1		--
ENSG00000139209.15	1.36146	-0.952879	0.000921268	0.0394488	0.05	0.06	0.18	0.11	SLC38A4	solute carrier family 38, member 4
ENSG00000134321.11	3.55919	-1.95436	2.95234e-06	0.000748609	0.01	0	0.07	0.11	RSAD2	radical S-adenosyl methionine domain containing 2
ENSG00000272267.2	-2.15155	-1.20697	9.93552e-06	0.00185469	0.39	0.39	0.05	0.12	RP11-375N15.2		--
ENSG00000246465.1	1.97019	-1.54891	0.000203236	0.0140889	0.05	0.03	0.14	0.18	RP11-57A19.2		--
ENSG00000232504.4	-2.01478	-1.30336	5.55228e-05	0.0059616	0.63	0.62	0.09	0.21	ST3GAL5-AS1	ST3GAL5 antisense RNA 1 (head to head)
ENSG00000261652.2	-1.0882	1.56148	5.45138e-08	3.24369e-05	4.19	5.21	2.06	2.33	C15orf65	chromosome 15 open reading frame 65
ENSG00000122194.18	5.47242	-2.91439	0.00109327	0.0431463	0	0	0.06	0.01	PLG	plasminogen
ENSG00000155495.8	5.47118	-2.91502	0.00109327	0.0431463	0	0	0.02	0.04	MAGEC1	melanoma antigen family C1
ENSG00000178445.8	1.39367	-0.669376	0.000280363	0.0177581	0.04	0.11	0.24	0.14	GLDC	glycine dehydrogenase (decarboxylating)
ENSG00000164400.5	1.80857	-0.973719	2.32783e-05	0.00349922	0.3	0.13	1.01	0.53	CSF2	colony stimulating factor 2 (granulocyte-macrophage)
ENSG00000152076.18	-1.09856	0.70649	6.62727e-06	0.00139178	0.74	0.88	0.47	0.28	CCDC74B	coiled-coil domain containing 74B
ENSG00000177688.6	5.70862	-2.76997	0.000286343	0.0177581	0	0	0.25	0.04	SUMO4	small ubiquitin-like modifier 4
ENSG00000242697.2	2.37163	-1.60812	2.85678e-05	0.00405933	0.08	0.09	0.6	0.33	RPL5P12	ribosomal protein L5 pseudogene 12
ENSG00000104327.7	-2.87326	-2.07639	0.000129096	0.0108127	0.18	0.03	0.03	0	CALB1	calbindin 1, 28kDa
ENSG00000140015.19	-2.66119	-1.66858	1.48533e-05	0.00254027	0.03	0.04	0	0.01	KCNH5	potassium channel, voltage gated eag related subfamily H, member 5
ENSG00000262319.1	-5.50894	-2.91562	0.00109327	0.0431463	0.1	0	0	0	CTC-457L16.2		--
ENSG00000272721.5	-3.2074	-2.25548	0.000165215	0.0122883	0.84	0.5	0.07	0.06	RP11-778D9.12		--
ENSG00000212123.3	1.02143	2.1425	1.70255e-08	1.27965e-05	1.62	1.95	3.96	3.25	PRR22	proline rich 22
ENSG00000257759.2	-2.71736	-1.87781	5.63083e-05	0.00597852	0.83	0.32	0.09	0.08	RP11-486O13.4		--
ENSG00000196415.9	-1.58988	-0.136629	4.12336e-07	0.000157023	0.88	1.07	0.32	0.32	PRTN3	proteinase 3
ENSG00000272606.1	-1.05114	0.99555	2.67713e-06	0.000713935	4.64	5.13	1.82	2.85	RP11-554J4.1		--
ENSG00000142789.19	5.47283	-2.91418	0.00109327	0.0431463	0	0	0.23	0	CELA3A	chymotrypsin-like elastase family, member 3A
ENSG00000224939.1	2.52813	-2.25615	0.00109373	0.0431463	0.03	0	0.13	0.07	LINC00184	long intergenic non-protein coding RNA 184
ENSG00000273243.1	1.81897	-1.38258	0.000296518	0.0180189	0.25	0.27	0.51	1.33	CTA-217C2.2		--
ENSG00000228444.2	-2.55074	-1.99275	0.000264154	0.0171856	0.43	0.24	0.03	0.08	RP11-173B14.4		--
ENSG00000135625.7	-1.5184	-1.05161	0.000406686	0.0221667	0.22	0.25	0.14	0.02	EGR4	early growth response 4
ENSG00000183674.11	5.472	-2.9146	0.00109327	0.0431463	0	0	0.13	0.07	LINC00518	long intergenic non-protein coding RNA 518
ENSG00000067798.13	1.05071	1.1682	1.46416e-06	0.000431112	0.11	0.15	0.28	0.24	NAV3	neuron navigator 3
ENSG00000221676.1	-5.74968	-2.76886	0.000286343	0.0177581	0.93	1.63	0	0	RNU6ATAC	RNA, U6atac small nuclear (U12-dependent splicing)
ENSG00000249923.1	-3.27771	-2.20755	9.33425e-05	0.00854473	0.13	0.1	0.02	0	XXbac-B444P24.8		--
ENSG00000197405.7	-1.14112	0.482372	1.11474e-05	0.0020098	0.73	0.65	0.23	0.39	C5AR1	complement component 5a receptor 1
ENSG00000239559.2	-1.23592	0.740187	4.10657e-07	0.000157023	7.52	6.17	3.62	2.19	RPL37P2	ribosomal protein L37 pseudogene 2
ENSG00000135363.11	6.08771	-2.5193	2.01043e-05	0.00312064	0	0	0.06	0.11	LMO2	LIM domain only 2 (rhombotin-like 1)
ENSG00000162645.12	-1.51074	-0.0661589	9.29141e-07	0.000308572	0.68	0.36	0.15	0.21	GBP2	guanylate binding protein 2, interferon-inducible
ENSG00000185432.11	-1.22621	0.949415	7.74158e-08	4.05586e-05	0.52	0.6	0.14	0.34	METTL7A	methyltransferase like 7A
ENSG00000184260.5	1.27001	-0.533763	0.000447788	0.0237719	0.66	0.99	1.74	2.2	HIST2H2AC	histone cluster 2, H2ac
ENSG00000269720.1	2.8363	-1.73787	1.17418e-05	0.00208297	0.05	0.06	0.17	0.68	CTD-2521M24.5		--
ENSG00000280594.1	-2.7478	-2.16236	0.000378225	0.0211636	0.55	0.37	0	0.13	AP000432.1		--
ENSG00000215533.8	2.10729	-1.99151	0.00124578	0.0460889	0.02	0.09	0.47	0.04	LINC00189	long intergenic non-protein coding RNA 189
ENSG00000275532.1	-1.82201	-1.4339	0.000446922	0.0237701	0.97	0.79	0.25	0.24	CTB-58E17.3		--
ENSG00000187808.4	-1.64433	-0.819065	4.11124e-05	0.00512756	0.32	0.56	0.09	0.18	SOWAHD	sosondowah ankyrin repeat domain family member D
ENSG00000261604.1	-3.64531	-2.57718	0.000625159	0.0299583	0.08	0.06	0	0.01	CTD-2636A23.2		--
ENSG00000225285.1	-5.85825	-2.69993	7.55825e-05	0.00721977	0	0.44	0	0	RP4-758J18.10		--
ENSG00000274253.4	-5.51155	-2.91432	0.00109327	0.0431463	0.11	0.07	0	0	RP11-566K19.6		--
ENSG00000170006.11	1.02206	1.89891	4.96544e-08	3.083e-05	0.21	0.17	0.37	0.39	TMEM154	transmembrane protein 154
ENSG00000128604.18	-1.01656	-0.241378	0.00115763	0.04431	0.29	0.3	0.2	0.09	IRF5	interferon regulatory factor 5
ENSG00000257752.1	-2.94101	-2.03142	7.51226e-05	0.00721977	0.33	0.51	0.03	0.07	RP11-474L23.3		--
ENSG00000188859.6	3.47276	-2.63944	0.00114643	0.0440959	0	0.02	0.05	0.16	FAM78B	family with sequence similarity 78, member B
ENSG00000273925.1	-5.51221	-2.91399	0.00109327	0.0431463	0.27	0.24	0	0	RP11-227D13.5		--
ENSG00000232334.1	2.28263	-2.11934	0.00120215	0.0454959	0.18	0	0.37	0.58	RP11-47G11.2		--
ENSG00000272871.1	2.6928	-1.84167	3.3461e-05	0.00452929	0.06	0.02	0.23	0.29	RP11-408A13.4		--
ENSG00000261239.6	-5.51221	-2.91399	0.00109327	0.0431463	0.02	0.02	0	0	ANKRD26P1	ankyrin repeat domain 26 pseudogene 1
ENSG00000184923.12	5.4718	-2.91471	0.00109327	0.0431463	0	0	0.03	0.02	NUTM2A	NUT family member 2A
ENSG00000136883.12	-5.8492	-2.70445	0.000146972	0.0114378	0.16	0	0	0	KIF12	kinesin family member 12
ENSG00000081051.7	5.70903	-2.76976	0.000286343	0.0177581	0	0	0.13	0	AFP	alpha-fetoprotein
ENSG00000279516.1	1.15362	0.953989	5.05342e-07	0.000185039	0.52	0.49	1.15	1.11	FAM230C	family with sequence similarity 230, member C
ENSG00000162897.14	5.59472	-2.84069	0.000558963	0.0276203	0	0	0.06	0.04	FCAMR	Fc receptor, IgA, IgM, high affinity
ENSG00000250509.1	-1.32569	-0.654366	0.000466655	0.0246427	1.08	0.7	0.54	0.17	CTC-573N18.1		--
ENSG00000279348.1	1.19766	1.60564	2.47701e-09	2.721e-06	0.6	0.88	1.9	1.48	RP11-566E18.1		--
ENSG00000215692.2	5.59452	-2.84079	0.000558963	0.0276203	0	0	0.31	0.3	AC114730.8		--
ENSG00000277728.1	1.38297	-0.806048	0.000383381	0.0212616	0.66	0.39	1.67	1.1	RP11-143K11.7		--
ENSG00000275318.1	-1.38096	-0.992042	0.00128075	0.0472602	0.86	0.66	0.33	0.25	RP11-526D8.11		--
ENSG00000253917.4	1.43887	-0.477417	3.48472e-05	0.00462917	0.59	0.3	1.56	0.89	AC226119.5		--
ENSG00000163909.7	5.91057	-2.63921	7.55825e-05	0.00721977	0	0	0.05	0.04	HEYL	hes-related family bHLH transcription factor with YRPW motif-like
ENSG00000257830.1	3.66349	-2.51922	0.00034038	0.0194479	0.04	0	0.26	0.32	RP11-845M18.7		--
ENSG00000217646.1	-2.46109	-1.80721	0.000109734	0.00964341	1.79	0.15	0.28	0.07	HIST1H2BPS2	histone cluster 1, H2b, pseudogene 2
ENSG00000259384.6	-9.9306	0.799294	1.80952e-55	1.29204e-51	3.5	3.64	0	0	GH1	growth hormone 1
ENSG00000249565.2	7.16977	0.426918	2.22841e-42	1.27291e-38	0.02	0	2.39	1.32	SERBP1P5	SERPINE1 mRNA binding protein 1 pseudogene 5
ENSG00000228812.7	3.74986	-2.46189	0.000185107	0.013317	0	0.04	0.42	0.17	LAMA5-AS1	LAMA5 antisense RNA 1
ENSG00000130045.15	-1.13348	-0.357733	0.000581392	0.0284822	0.7	0.28	0.21	0.24	NXNL2	nucleoredoxin-like 2
ENSG00000272787.1	2.06869	-1.6396	0.000201115	0.0140796	0.18	0.08	0.69	0.42	KB-226F1.2		--
ENSG00000224281.4	1.08724	-0.255804	0.000792944	0.0354418	0.15	0.25	0.38	0.46	SLC25A5-AS1	SLC25A5 antisense RNA 1
ENSG00000171931.12	2.7343	-0.0879741	2.95025e-15	8.4262e-12	0.05	0.06	0.4	0.35	FBXW10	F-box and WD repeat domain containing 10
ENSG00000279953.1	1.45196	-0.821913	0.000383381	0.0212616	0.1	0.24	0.55	0.36	RP11-338K17.5		--
ENSG00000261485.1	-2.15346	-1.63519	0.000127313	0.0106946	0.14	0.44	0.07	0.05	PAN3-AS1	PAN3 antisense RNA 1
ENSG00000166349.9	1.58529	-0.952341	0.00026089	0.0170776	0.01	0.05	0.1	0.08	RAG1	recombination activating gene 1
ENSG00000178084.1	-2.05355	-1.5461	0.000203236	0.0140889	0.21	0.27	0.03	0.08	HTR3C	5-hydroxytryptamine (serotonin) receptor 3C, ionotropic
ENSG00000168481.8	-1.42824	-0.246897	9.39048e-06	0.00180001	0.44	0.16	0.1	0.12	LGI3	leucine-rich repeat LGI family, member 3
ENSG00000205693.3	3.13091	-2.25602	0.000165215	0.0122883	0.02	0.03	0.24	0.23	MANSC4	MANSC domain containing 4
ENSG00000162461.7	1.49802	-0.857955	0.000304488	0.0183323	0.02	0.14	0.17	0.25	SLC25A34	solute carrier family 25, member 34
ENSG00000049249.8	-1.04337	0.50668	4.47211e-05	0.00541221	0.24	0.3	0.11	0.15	TNFRSF9	tumor necrosis factor receptor superfamily, member 9
ENSG00000260115.1	-3.74179	-2.51583	0.00034038	0.0194479	0.07	0.5	0	0.03	CTC-420A11.2		--
ENSG00000232640.1	-6.68217	-2.1153	5.69379e-08	3.31878e-05	0.47	1.08	0	0	RP1-266L20.2		--
ENSG00000214188.9	-1.16358	-0.221183	0.000243176	0.0161669	0.6	0.32	0.23	0.18	ST7-OT4	ST7 overlapping transcript 4
ENSG00000158806.13	-2.35791	-2.11953	0.00120215	0.0454959	0.22	0.04	0.01	0.04	NPM2	nucleophosmin/nucleoplasmin 2
ENSG00000274976.1	-3.54451	-2.64008	0.00114643	0.0440959	0.72	0.06	0	0.05	RP11-8P13.5		--
ENSG00000262172.1	5.91138	-2.6388	7.55825e-05	0.00721977	0	0	0.65	0.16	CTD-2529O21.1		--
ENSG00000275209.1	5.486	1.75936	3.23801e-74	3.0827e-70	4.31	0.52	229.34	0.47	FP236383.4		--
ENSG00000272273.1	-2.30217	-1.91578	0.000476899	0.0250381	0.89	0.24	0.09	0.13	XXbac-BPG252P9.10		--
ENSG00000252464.1	1.87592	-1.11804	2.40112e-05	0.00355328	0.43	0.66	2.59	1.46	RN7SKP70	RNA, 7SK small nuclear pseudogene 70
ENSG00000172478.17	-1.14683	1.20505	9.26838e-08	4.56404e-05	0.9	1.11	0.43	0.47	C2orf54	chromosome 2 open reading frame 54
ENSG00000214894.6	-1.29795	-0.78729	0.00108449	0.0431463	0.37	0.26	0.13	0.12	LINC00243	long intergenic non-protein coding RNA 243
ENSG00000159915.12	-2.04645	-1.70528	0.000496504	0.025783	0.16	0.02	0.03	0.02	ZNF233	zinc finger protein 233
ENSG00000273321.1	5.7078	-2.77039	0.000286343	0.0177581	0	0	0.3	0.25	RP11-621L6.3		--
ENSG00000125895.5	2.53298	-1.9536	0.000158255	0.0120211	0.05	0	0.25	0.09	TMEM74B	transmembrane protein 74B
ENSG00000095932.6	1.53043	-1.25707	0.000774524	0.0347817	0.19	0.02	0.44	0.19	SMIM24	small integral membrane protein 24
ENSG00000272372.1	-2.43568	-2.07047	0.000439444	0.0235478	0	0.34	0.03	0.03	RP11-441F2.5		--
ENSG00000228737.2	5.81305	-2.70315	0.000146972	0.0114378	0	0	0.35	0.19	AC008781.7		--
ENSG00000261435.1	-5.51025	-2.91497	0.00109327	0.0431463	0.11	0.03	0	0	RP13-126P21.2		--
ENSG00000228238.1	5.47139	-2.91492	0.00109327	0.0431463	0	0	0.09	0.16	GS1-304P7.2		--
ENSG00000278703.1	5.47221	-2.9145	0.00109327	0.0431463	0	0	0.4	0.14	RP11-706P11.2		--
ENSG00000229356.1	-5.95193	-2.63785	7.55825e-05	0.00721977	0.21	0.26	0	0	LRRC3-AS1	LRRC3 antisense RNA 1 (head to head)
ENSG00000237624.1	-2.14598	-1.6388	0.000201115	0.0140796	0.31	0.18	0.08	0.03	OXCT2P1	3-oxoacid CoA transferase 2 pseudogene 1
ENSG00000254245.2	-3.54494	-2.63965	0.00114643	0.0440959	0.06	0.01	0	0	PCDHGA3	protocadherin gamma subfamily A, 3
ENSG00000189221.9	1.2725	0.0724155	9.54983e-06	0.0018078	0.13	0.06	0.22	0.22	MAOA	monoamine oxidase A
ENSG00000138769.10	3.57089	-2.57792	0.000625159	0.0299583	0	0.01	0.03	0.06	CDKL2	cyclin-dependent kinase-like 2 (CDC2-related kinase)
ENSG00000280023.1	-1.60876	-1.45931	0.00136362	0.0495502	0.31	0.68	0.09	0.22	LLNLR-276H7.1		--
ENSG00000272382.1	-1.16601	-0.220277	0.000243176	0.0161669	1.25	0.84	0.47	0.45	CTD-2035E11.4		--
ENSG00000279206.1	-3.73837	-2.51734	0.00034038	0.0194479	0.27	0.38	0.04	0	RP5-991G20.6		--
ENSG00000177324.13	-5.51155	-2.91432	0.00109327	0.0431463	0.04	0.02	0	0	BEND2	BEN domain containing 2
ENSG00000273980.1	-2.60712	-1.95437	0.000158255	0.0120211	1.15	0.31	0	0.23	RP13-49I15.6		--
ENSG00000197249.12	1.45878	-1.20904	0.00101181	0.042373	0.05	0.03	0.14	0.09	SERPINA1	serpin peptidase inhibitor, clade A (alpha-1 antiproteinase, antitrypsin), member 1
ENSG00000236493.2	3.66423	-2.51817	0.00034038	0.0194479	0	0.03	0.34	0.05	EIF2S2P3	eukaryotic translation initiation factor 2, subunit 2 beta pseudogene 3
ENSG00000188732.10	-1.18628	-0.591577	0.000672288	0.0312723	0.51	0.49	0.18	0.25	FAM221A	family with sequence similarity 221, member A
ENSG00000124772.11	1.22002	-0.25862	0.000133022	0.0110443	0.16	0.03	0.31	0.16	CPNE5	copine V
ENSG00000233924.1	6.08952	-2.51837	2.01043e-05	0.00312064	0	0	0.41	0.05	AL160471.6		--
ENSG00000270722.1	3.50458	-1.99287	5.26162e-06	0.00120222	0	0.31	1.92	1.84	U1		--
ENSG00000235531.9	-3.64146	-2.57911	0.000625159	0.0299583	0.06	0	0	0	MSC-AS1	MSC antisense RNA 1
ENSG00000178623.11	-1.64398	-1.32862	0.000848601	0.0372302	0.1	0.08	0.04	0.01	GPR35	G protein-coupled receptor 35
ENSG00000105982.16	1.12379	0.00401172	0.000116704	0.0101006	0.21	0.06	0.37	0.25	RNF32	ring finger protein 32
ENSG00000235908.1	-4.05156	-2.30526	2.96451e-05	0.00411061	0.73	0.2	0.05	0	RHOA-IT1	RHOA intronic transcript 1
ENSG00000229920.2	-5.85695	-2.70057	0.000146972	0.0114378	0.03	0.19	0	0	RPS4XP5	ribosomal protein S4X pseudogene 5
ENSG00000105737.9	1.07734	-0.116759	0.000499158	0.0258197	0.08	0.13	0.3	0.14	GRIK5	glutamate receptor, ionotropic, kainate 5
ENSG00000103723.12	1.84774	-1.49088	0.000307963	0.0183323	0.02	0.01	0.05	0.06	AP3B2	adaptor-related protein complex 3, beta 2 subunit
ENSG00000272853.1	-3.13126	-1.57665	4.89225e-07	0.000181464	0.49	0.39	0.07	0.02	RP11-398C13.6		--
ENSG00000277007.1	1.05132	0.202627	0.000153874	0.0118139	0.22	0.25	0.47	0.5	RP11-392O17.2		--
ENSG00000232133.1	1.67906	0.0260491	4.18926e-08	2.84879e-05	0.24	0.27	0.91	0.72	IMPDH1P10	IMP (inosine monophosphate) dehydrogenase 1 pseudogene 10
ENSG00000261596.2	2.98059	-2.35632	0.000514241	0.0264159	0.06	0	0.12	0.39	CTB-31N19.3		--
ENSG00000272540.1	5.70903	-2.76976	0.000286343	0.0177581	0	0	0.41	0	XXbac-BPG252P9.9		--
ENSG00000276354.1	-2.21574	-1.76993	0.00031002	0.0183323	2.77	1.96	0.34	0.65	UPF3BP1	UPF3B pseudogene 1
ENSG00000233926.1	-6.03816	-2.57914	3.8944e-05	0.00498221	0.2	0	0	0	RP11-154D17.1		--
ENSG00000201183.1	5.81142	-2.70399	0.000146972	0.0114378	0	0	0.15	1.88	RNVU1-3	RNA, variant U1 small nuclear 3
ENSG00000230679.1	2.41328	-2.03339	0.000439444	0.0235478	0.15	0.06	0.9	0.31	ENO1-AS1	ENO1 antisense RNA 1
ENSG00000081800.8	1.93698	-1.18637	2.39799e-05	0.00355328	0.04	0.02	0.15	0.1	SLC13A1	solute carrier family 13 (sodium/sulfate symporter), member 1
ENSG00000233250.1	-1.96935	-1.4616	0.000201186	0.0140796	2.26	1.65	0.55	0.43	RP3-339A18.6		--
ENSG00000182175.13	-5.75163	-2.76789	0.000286343	0.0177581	0	0.02	0	0	RGMA	repulsive guidance molecule family member a
ENSG00000002079.12	1.46081	1.83084	3.52441e-14	9.15097e-11	0.33	0.18	0.76	0.64	MYH16	myosin, heavy chain 16 pseudogene
ENSG00000273356.1	-1.17644	-0.216466	0.00014233	0.0114378	0.36	0.59	0.11	0.3	RP11-804H8.6		--
ENSG00000187908.15	1.13892	0.743153	2.3435e-06	0.000643585	0.11	0.1	0.28	0.2	DMBT1	deleted in malignant brain tumors 1
ENSG00000188487.11	2.67051	-2.16321	0.000378225	0.0211636	0.02	0	0.09	0.06	INSC	inscuteable homolog (Drosophila)
ENSG00000232295.7	2.2826	-1.87732	0.000293258	0.0178969	0.03	0.02	0.17	0.09	RP11-154D6.1		--
ENSG00000226864.1	3.61176	-1.91495	1.65577e-06	0.000482555	0.02	0.03	0.43	0.27	ATE1-AS1	ATE1 antisense RNA 1
ENSG00000171817.16	-1.22259	-0.383498	0.000241253	0.0161669	0.34	0.14	0.11	0.1	ZNF540	zinc finger protein 540
ENSG00000272695.1	6.45477	-2.25649	7.582e-07	0.000270687	0	0	0.1	0.17	GAS6-AS2	GAS6 antisense RNA 2 (head to head)
ENSG00000273489.1	1.48958	-1.28061	0.00112118	0.0440467	0.05	0.03	0.14	0.11	RP11-180C16.1		--
ENSG00000130518.16	-1.01299	1.14183	2.93302e-06	0.000748609	0.48	0.65	0.2	0.36	KIAA1683	KIAA1683
ENSG00000264044.1	-6.13235	-2.51618	2.01043e-05	0.00312064	0.07	0.25	0	0	RP11-192H23.7		--
ENSG00000278905.1	-1.28663	-0.432614	0.000124227	0.0105284	0.25	0.28	0.08	0.13	RP11-65F13.3		--
ENSG00000267226.2	-2.19714	-0.572766	1.26128e-08	1.00065e-05	0.58	0.89	0.24	0.08	RP11-126O1.5		--
ENSG00000120457.11	1.78455	-1.6694	0.00114868	0.0440959	0	0.03	0.09	0.03	KCNJ5	potassium channel, inwardly rectifying subfamily J, member 5
ENSG00000186714.12	1.46528	-1.11948	0.00091117	0.0392798	0.03	0.01	0.07	0.06	CCDC73	coiled-coil domain containing 73
ENSG00000162896.5	6.00127	-2.57832	3.8944e-05	0.00498221	0	0	0.02	0.07	PIGR	polymeric immunoglobulin receptor
ENSG00000276214.1	-5.85178	-2.70316	0.000146972	0.0114378	0.34	0.15	0	0	CTD-2146O16.1		--
ENSG00000261550.1	5.59452	-2.84079	0.000558963	0.0276203	0	0	0.31	0.3	RP11-467J12.4		--
ENSG00000271420.1	-2.16853	-1.8025	0.00031002	0.0183323	0.32	0.71	0.04	0.18	RP5-1057J7.7		--
ENSG00000279605.1	1.45777	-1.20765	0.00101181	0.042373	0.03	0.04	0.14	0.05	RP11-661A12.8		--
ENSG00000262209.2	5.47262	-2.91429	0.00109327	0.0431463	0	0	0.05	0	PCDHGB3	protocadherin gamma subfamily B, 3
ENSG00000176753.5	-1.78236	-0.954747	3.31561e-05	0.00450939	0.43	0.14	0.12	0.04	C15orf56	chromosome 15 open reading frame 56
ENSG00000261272.1	3.47358	-2.63902	0.00114643	0.0440959	0	0	0.03	0.03	MUC22	mucin 22
ENSG00000275215.1	-2.61274	-2.25174	0.000644364	0.0305487	0	3.19	0	0.46	RNA5-8S5	RNA, 5.8S ribosomal 5
ENSG00000183889.12	3.47681	1.05031	1.55399e-35	7.39724e-32	0.12	0.24	1.65	2.27	NPIPA5	nuclear pore complex interacting protein family, member A5
ENSG00000271853.5	4.04936	-2.25693	1.60881e-05	0.00270289	0.03	0	0.13	0.52	RP1-178F15.5		--
ENSG00000152402.10	-1.16418	0.0176198	7.0496e-05	0.00718488	0.08	0.06	0.02	0.04	GUCY1A2	guanylate cyclase 1, soluble, alpha 2
ENSG00000279522.1	1.50997	-0.656684	4.74431e-05	0.00550822	0.19	0.13	0.41	0.51	CTC-487M23.6		--
ENSG00000164796.17	2.83705	-1.73615	6.9367e-06	0.00142997	0	0.01	0.03	0.02	CSMD3	CUB and Sushi multiple domains 3
ENSG00000258967.1	2.32768	-1.64038	4.62912e-05	0.00544338	0.39	0.09	1.13	1.39	HMGN1P3	high mobility group nucleosome binding domain 1 pseudogene 3
ENSG00000164556.7	5.59349	-2.84132	0.000558963	0.0276203	0	0	0.02	0.16	FAM183B	family with sequence similarity 183, member B
ENSG00000222112.1	2.33582	-1.01401	2.88601e-07	0.000126605	0.39	0.43	2.02	2.17	RN7SKP16	RNA, 7SK small nuclear pseudogene 16
ENSG00000225595.2	-6.35648	-2.35622	2.7974e-06	0.000726331	0.16	0.03	0	0	XXbac-BPG308K3.6		--
ENSG00000280109.1	-1.05204	0.819033	8.01534e-06	0.00160088	0.12	0.28	0.1	0.09	PLAC4	placenta-specific 4
ENSG00000269399.2	-1.57395	-0.434287	9.55773e-06	0.0018078	0.51	0.35	0.18	0.11	CTD-3222D19.12		--
ENSG00000105289.14	-1.11267	1.15189	3.10106e-07	0.000129346	0.74	0.7	0.2	0.46	TJP3	tight junction protein 3
ENSG00000118307.18	-1.80176	-1.57489	0.000713427	0.0327574	0.09	0.21	0.01	0.07	CASC1	cancer susceptibility candidate 1
ENSG00000183486.12	3.38948	-2.07567	1.66769e-05	0.00275323	0	0.02	0.06	0.12	MX2	MX dynamin-like GTPase 2
ENSG00000225039.1	-1.79146	-1.23129	0.000179711	0.0130572	1.26	0.97	0.27	0.36	LINC01058	long intergenic non-protein coding RNA 1058
ENSG00000204767.3	5.91118	-2.6389	7.55825e-05	0.00721977	0	0	0.09	0.03	FAM196B	family with sequence similarity 196, member B
ENSG00000172508.10	-1.05466	-0.184118	0.000627549	0.0300225	0.25	0.23	0.11	0.12	CARNS1	carnosine synthase 1
ENSG00000267416.1	3.33215	-2.11827	2.96483e-05	0.00411061	0.07	0	0.62	0.17	CTD-2319I12.2		--
ENSG00000281376.1	3.66342	-2.51859	0.00034038	0.0194479	0	0.01	0.13	0.07	ABALON	apoptotic BCL2L1-antisense long non-coding RNA
ENSG00000163293.11	1.16452	1.20172	8.09439e-08	4.05586e-05	0.19	0.26	0.43	0.57	NIPAL1	NIPA-like domain containing 1
ENSG00000070886.10	5.91057	-2.63921	7.55825e-05	0.00721977	0	0	0.04	0.03	EPHA8	EPH receptor A8
ENSG00000122367.19	-2.04922	0.0650018	2.94387e-11	5.60533e-08	0.28	0.15	0.06	0.05	LDB3	LIM domain binding 3
ENSG00000224273.1	6.24675	-2.40793	5.38828e-06	0.00120344	0	0	0.42	0.29	AC005077.7		--
ENSG00000160219.11	2.90073	-2.40735	0.000903606	0.0391392	0	0.01	0.07	0.01	GAB3	GRB2-associated binding protein 3
ENSG00000279672.1	-1.05535	-0.328878	0.00100719	0.0423033	1.48	1.25	0.65	0.66	CMB9-55F22.1		--
ENSG00000261599.5	4.04996	-2.25662	1.60881e-05	0.00270289	0	0	0.03	0.06	HERC2P8	hect domain and RLD 2 pseudogene 8
ENSG00000240023.1	5.47283	-2.91418	0.00109327	0.0431463	0	0	0.28	0	RP11-561B11.1		--
ENSG00000250474.1	1.40542	-0.395101	5.04613e-05	0.00569601	0.35	0.35	1.05	0.81	WBP1LP2	WW domain binding protein 1-like pseudogene 2
ENSG00000255502.5	-5.8492	-2.70445	0.000146972	0.0114378	0.3	0	0	0	RP11-379J13.2		--
ENSG00000151632.16	-2.05087	-1.27811	2.36043e-05	0.00352964	0.1	0.12	0.02	0.03	AKR1C2	aldo-keto reductase family 1, member C2
ENSG00000149658.17	-1.27558	6.92139	7.39059e-21	3.01547e-17	45.91	43.95	19.73	17.21	YTHDF1	YTH N(6)-methyladenosine RNA binding protein 1
ENSG00000257038.1	-1.45462	-0.516818	4.79139e-05	0.00551998	0.48	0.48	0.19	0.16	RP11-800A3.7		--
ENSG00000243649.8	-1.40073	0.769921	7.98107e-09	6.9075e-06	0.79	0.66	0.27	0.28	CFB	complement factor B
ENSG00000233073.1	5.70862	-2.76997	0.000286343	0.0177581	0	0	0.39	0.07	AC005009.2		--
ENSG00000250072.5	1.12464	-0.533115	0.00123569	0.0460547	0.11	0.09	0.31	0.12	CTC-529P8.1		--
ENSG00000166341.7	6.5809	-2.16242	2.0702e-07	9.69294e-05	0	0	0.04	0.01	DCHS1	dachsous cadherin-related 1
ENSG00000261420.1	2.48288	-1.73687	4.05726e-05	0.00510481	0	0.08	0.1	0.33	RP1-168L15.5		--
ENSG00000226849.1	-1.41563	-1.20147	0.00129449	0.0475828	0.02	0.35	0.08	0.05	RP4-635E18.7		--
ENSG00000159289.6	2.16935	-1.95331	0.000772469	0.0347441	0.03	0.01	0.14	0.04	GOLGA6A	golgin A6 family, member A
ENSG00000256268.1	1.35254	-0.822505	0.000897052	0.0391156	0.21	0.34	0.78	0.62	RP11-221N13.3		--
ENSG00000270571.2	1.6201	-0.111397	2.1731e-07	0.000100106	0.18	0.03	0.35	0.3	RP11-355F16.1		--
ENSG00000177464.4	2.31095	-1.16229	9.8044e-07	0.000321866	0.02	0.06	0.22	0.14	GPR4	G protein-coupled receptor 4
ENSG00000151715.7	-2.24849	-1.95195	0.000772469	0.0347441	0.11	0.12	0.02	0.03	TMEM45B	transmembrane protein 45B
ENSG00000239474.6	5.81183	-2.70378	0.000146972	0.0114378	0	0	0.03	0.1	KLHL41	kelch-like family member 41
ENSG00000178107.2	2.06517	-1.63947	0.000201115	0.0140796	0.13	0.36	0.74	1.3	RP11-998D10.4		--
ENSG00000258586.1	-1.66479	-0.668534	6.47002e-06	0.00137724	0.58	0.72	0.06	0.34	RP5-1021I20.2		--
ENSG00000250220.1	-3.20803	-2.25517	0.000165215	0.0122883	0.41	0.3	0.04	0.03	RP11-692D12.1		--
ENSG00000166670.9	2.58765	-1.9152	9.4526e-05	0.00862543	0.04	0.01	0.21	0.15	MMP10	matrix metallopeptidase 10
ENSG00000273765.1	-5.74773	-2.76983	0.000286343	0.0177581	0.41	0.28	0	0	RP11-370I10.11		--
ENSG00000167588.12	1.47708	-0.450344	1.83201e-05	0.00295615	0.12	0.07	0.27	0.28	GPD1	glycerol-3-phosphate dehydrogenase 1 (soluble)
ENSG00000225450.1	2.02121	-1.67091	0.000316595	0.0186438	0.19	0.15	0.92	0.51	RP3-508I15.14		--
ENSG00000178033.5	-1.18995	-0.590061	0.000672288	0.0312723	0.06	0.09	0.02	0.04	FAM26E	family with sequence similarity 26, member E
ENSG00000226380.7	1.25594	0.311122	4.73988e-06	0.00110964	0.09	0.1	0.19	0.26	AC058791.1		--
ENSG00000234293.1	-3.81914	-2.46343	0.000185107	0.013317	0.92	0.06	0.06	0	BACH1-IT3	BACH1 intronic transcript 3
ENSG00000253203.6	1.04002	0.700034	1.69097e-05	0.00277562	0.62	0.75	1.23	1.56	GUSBP3	glucuronidase, beta pseudogene 3
ENSG00000269968.1	1.62635	-0.0910644	3.84791e-07	0.000150548	0.11	1.7	5.04	0.44	RP5-940J5.9		--
ENSG00000157152.16	2.85953	-2.0348	7.51226e-05	0.00721977	0.01	0	0.03	0.08	SYN2	synapsin II
ENSG00000197479.6	-1.27599	-0.226678	4.3203e-05	0.0052958	0.17	0.31	0.1	0.09	PCDHB11	protocadherin beta 11
ENSG00000213080.3	5.4718	-2.91471	0.00109327	0.0431463	0	0	0.13	0.11	RP11-312J18.5		--
ENSG00000250202.2	-5.50894	-2.91562	0.00109327	0.0431463	0.82	0	0	0	RP11-397E7.2		--
ENSG00000225889.7	3.47439	-2.6386	0.00114643	0.0440959	0	0.01	0.14	0.04	AC074289.1		--
ENSG00000205976.4	3.66329	-2.51933	0.00034038	0.0194479	0.01	0	0.06	0.09	RP11-404K5.2		--
ENSG00000198286.9	6.99213	-1.84078	1.23644e-09	1.41256e-06	0	0	0.13	0.05	CARD11	caspase recruitment domain family, member 11
ENSG00000066294.14	3.66301	-2.5188	0.00034038	0.0194479	0	0	0.02	0.02	CD84	CD84 molecule
ENSG00000235172.7	1.59226	-1.12001	0.000337573	0.0194479	0.19	0.16	0.3	0.76	LINC01366	long intergenic non-protein coding RNA 1366
ENSG00000273106.1	-5.63871	-2.83816	0.000558963	0.0276203	0.02	0.23	0	0	RP11-559M23.1		--
ENSG00000214145.6	-1.11291	1.57647	2.2084e-08	1.61729e-05	0.9	0.77	0.27	0.49	LINC00887	long intergenic non-protein coding RNA 887
ENSG00000134007.3	5.81244	-2.70347	0.000146972	0.0114378	0	0	0.05	0.07	ADAM20	ADAM metallopeptidase domain 20
ENSG00000276101.1	-2.05376	-1.87611	0.00124207	0.0460889	0.54	0.46	0.24	0	RP11-455O6.8		--
ENSG00000154556.17	-1.1197	0.928427	9.16902e-07	0.000308245	0.23	0.27	0.07	0.16	SORBS2	sorbin and SH3 domain containing 2
ENSG00000231663.1	-1.00976	0.178732	0.000301717	0.0182571	2.25	2.1	1.01	1.13	RP5-827C21.4		--
ENSG00000244945.1	1.75935	-1.30344	0.000393394	0.0215657	0.01	0.13	0.28	0.19	RP11-1379J22.2		--
ENSG00000241697.4	-5.51286	-2.91367	0.00109327	0.0431463	0.04	0.06	0	0	TMEFF1	transmembrane protein with EGF-like and two follistatin-like domains 1
ENSG00000188505.4	-1.51205	-1.13921	0.00091117	0.0392798	0.26	0.26	0.05	0.13	NCCRP1	non-specific cytotoxic cell receptor protein 1 homolog (zebrafish)
ENSG00000203618.5	-1.0996	-0.420599	0.000856123	0.0374452	0.59	0.46	0.25	0.24	GP1BB	glycoprotein Ib (platelet), beta polypeptide
ENSG00000123700.4	-1.12067	-0.289579	0.000461554	0.0244572	0.14	0.19	0.04	0.1	KCNJ2	potassium channel, inwardly rectifying subfamily J, member 2
ENSG00000219891.2	1.18832	-0.532632	0.000935975	0.0398566	0.07	0.34	0.28	0.63	ZSCAN12P1	zinc finger and SCAN domain containing 12 pseudogene 1
ENSG00000266896.1	4.17982	-2.16285	4.73828e-06	0.00110964	0	0.02	0.18	0.16	RP1-266L20.9		--
ENSG00000144229.11	-3.44738	-2.70012	0.00114643	0.0440959	0	0.05	0	0	THSD7B	thrombospondin, type I, domain containing 7B
ENSG00000281538.1	-2.97224	-2.40928	0.000903606	0.0391392	0.63	0	0.08	0	RP4-669P10.20		--
ENSG00000245025.2	1.41387	0.575787	3.70897e-08	2.5837e-05	0.4	0.29	0.94	0.9	RP11-875O11.1		--
ENSG00000232489.1	-3.54753	-2.63837	0.00114643	0.0440959	0.15	0.12	0.02	0	MFAP1P1	microfibrillar-associated protein 1 pseudogene 1
ENSG00000205592.13	2.53038	-1.95296	0.000158255	0.0120211	0	0	0.01	0.01	MUC19	mucin 19, oligomeric
ENSG00000165269.12	-1.737	-0.266894	2.35095e-07	0.00010658	0.31	0.23	0.1	0.06	AQP7	aquaporin 7
ENSG00000229160.1	-1.1047	-0.504035	0.00109196	0.0431463	2.41	1.97	0.76	1.26	AC009229.6		--
ENSG00000259663.2	2.73575	-2.11942	0.000221287	0.015084	0.01	0	0.02	0.05	CTD-2314G24.2		--
ENSG00000141086.17	1.15176	0.430613	1.64792e-05	0.00275241	0.25	0.57	0.83	0.94	CTRL	chymotrypsin-like
ENSG00000096872.15	1.62522	-1.09733	0.000232466	0.0157707	0.06	0.06	0.17	0.21	IFT74	intraflagellar transport 74
ENSG00000227666.1	-2.04913	-1.54815	0.000203236	0.0140889	1.63	0.89	0.23	0.37	CYCSP24	cytochrome c, somatic pseudogene 24
ENSG00000276058.1	5.47139	-2.91492	0.00109327	0.0431463	0	0	0.22	0.37	STMN1P1	stathmin 1 pseudogene 1
ENSG00000164283.12	3.83064	-2.40773	0.000100578	0.00897687	0	0.01	0.11	0.09	ESM1	endothelial cell-specific molecule 1
ENSG00000148541.12	-1.0913	0.000410732	0.000172773	0.0126853	0.19	0.27	0.06	0.15	FAM13C	family with sequence similarity 13, member C
ENSG00000267194.1	-1.14054	1.04093	2.92563e-07	0.000126605	0.93	0.98	0.42	0.44	RP1-193H18.2		--
ENSG00000238286.1	1.80269	-0.971748	4.84771e-05	0.00556046	0.05	0.36	0.81	0.59	SLC35E1P1	solute carrier family 35, member E1 pseudogene 1
ENSG00000182511.11	1.58839	-0.953231	0.000138735	0.0113863	0.07	0.07	0.26	0.15	FES	FES proto-oncogene, tyrosine kinase
ENSG00000124253.10	-1.03808	-0.229842	0.000904445	0.0391392	0.21	0.22	0.09	0.11	PCK1	phosphoenolpyruvate carboxykinase 1 (soluble)
ENSG00000149781.12	2.13522	-1.77026	0.00031002	0.0183323	0.02	0.04	0.15	0.12	FERMT3	fermitin family member 3
ENSG00000279851.2	-2.96915	-1.69956	2.4101e-06	0.00065216	0.11	0.3	0	0.05	CH507-216K13.2		--
ENSG00000254791.1	-5.85825	-2.69993	7.55825e-05	0.00721977	0	0.98	0	0	FAR1-IT1	FAR1 intronic transcript 1
ENSG00000279041.1	1.41227	0.441241	7.89686e-08	4.05586e-05	0.54	0.31	1.19	1.09	CTD-2373N4.3		--
ENSG00000235245.1	-1.05422	0.558035	2.46981e-05	0.00363609	2.14	3.2	1.62	0.93	RP11-122K13.12		--
ENSG00000251365.1	-1.95153	-1.76877	0.00120586	0.0454959	0.51	0.6	0.16	0.12	RP11-332J15.3		--
ENSG00000237371.1	-6.12724	-2.51875	2.01043e-05	0.00312064	1.5	0.68	0	0	RP13-152O15.5		--
ENSG00000267179.1	1.71711	-1.57871	0.0010791	0.0431463	0.1	0.03	0.23	0.2	CTD-2006C1.13		--
ENSG00000037280.15	2.41253	-2.03245	0.000439444	0.0235478	0	0.01	0.08	0.01	FLT4	fms-related tyrosine kinase 4
ENSG00000251417.2	-1.68038	-1.11483	0.000159564	0.0120564	0.19	0.37	0.06	0.11	RP11-1348G14.4		--
ENSG00000233012.2	-2.01437	-1.43129	8.49921e-05	0.00790703	0.15	0.29	0.08	0.02	HDAC1P2	histone deacetylase 1 pseudogene 2
ENSG00000148671.13	-2.87352	-1.76821	1.17418e-05	0.00208297	0.33	0.48	0.03	0.08	ADIRF	adipogenesis regulatory factor
ENSG00000281772.1	-5.63154	-2.84173	0.000558963	0.0276203	0.66	0	0	0	RP11-567F11.2		--
ENSG00000227038.2	1.44012	-0.972385	0.000921268	0.0394488	0.05	0.12	0.22	0.23	GTF2IP7		--
ENSG00000061455.10	2.41228	-1.57691	1.75872e-05	0.00285402	0	0.02	0.05	0.03	PRDM6	PR domain containing 6
ENSG00000275530.1	-1.77512	-1.05035	5.06826e-05	0.00569601	7.13	13.74	2.59	3.32	FP671120.4		--
ENSG00000102935.11	-5.50894	-2.91562	0.00109327	0.0431463	0.03	0	0	0	ZNF423	zinc finger protein 423
ENSG00000147082.17	3.35799	-1.67103	3.06966e-07	0.000129346	0	0.01	0.1	0.07	CCNB3	cyclin B3
ENSG00000280311.1	-1.69731	-1.5154	0.00100328	0.0422011	0.26	0.55	0.22	0.02	RP13-554M15.5		--
ENSG00000256453.1	1.12043	-0.0551295	0.000213307	0.0145748	0.26	0.35	0.54	0.78	DND1	DND microRNA-mediated repression inhibitor 1
ENSG00000280374.1	-1.28053	-0.391346	0.000112524	0.00982813	0.99	1.32	0.42	0.52	RP11-337N6.3		--
ENSG00000128886.11	-1.16662	0.650737	2.69966e-06	0.000713935	0.9	0.64	0.28	0.4	ELL3	elongation factor RNA polymerase II-like 3
ENSG00000154133.14	1.02388	0.28779	0.000160601	0.0121027	0.15	0.13	0.36	0.21	ROBO4	roundabout, axon guidance receptor, homolog 4 (Drosophila)
ENSG00000260777.1	-1.02399	-0.103623	0.000568031	0.0279716	0.31	0.44	0.18	0.19	CTD-2008P7.1		--
ENSG00000271858.5	-3.98215	-2.35429	5.46151e-05	0.00590856	0.23	0.23	0	0.02	CYB561D2	cytochrome b561 family, member D2
ENSG00000240821.1	-2.49213	-2.03234	0.000439444	0.0235478	0.49	0.49	0.04	0.12	RPL9P25	ribosomal protein L9 pseudogene 25
ENSG00000250742.1	-2.02217	-0.875704	1.42634e-06	0.000431112	0.51	0.49	0.09	0.15	RP11-834C11.4		--
ENSG00000149201.9	1.36851	-0.579698	0.000135296	0.0111681	0.14	0.05	0.3	0.22	CCDC81	coiled-coil domain containing 81
ENSG00000167619.11	-1.25091	-0.503498	0.000249102	0.016469	0.31	0.31	0.05	0.21	TMEM145	transmembrane protein 145
ENSG00000122432.16	-3.64402	-2.57783	0.000625159	0.0299583	0.09	0.04	0	0.01	SPATA1	spermatogenesis associated 1
ENSG00000263470.1	-1.14141	-0.479753	0.000829397	0.0364999	1.84	0.5	0.44	0.63	RP11-160O5.1		--
ENSG00000187391.17	-2.28605	-1.54438	3.1707e-05	0.00433294	0.03	0.07	0	0.02	MAGI2	membrane associated guanylate kinase, WW and PDZ domain containing 2
ENSG00000125910.5	-1.12869	0.173056	5.07939e-05	0.00569601	0.66	0.98	0.36	0.39	S1PR4	sphingosine-1-phosphate receptor 4
ENSG00000204659.4	3.66208	-2.51995	0.00034038	0.0194479	0.03	0	0	0.47	CBY3	chibby homolog 3 (Drosophila)
ENSG00000259713.1	-3.05645	-2.35533	0.000514241	0.0264159	0.61	0.26	0.1	0	RP11-429B14.1		--
ENSG00000178462.11	1.8451	-1.48966	0.000671004	0.0312723	0.01	0.11	0.22	0.23	TUBAL3	tubulin, alpha-like 3
ENSG00000159784.17	3.50603	-1.99278	5.26162e-06	0.00120222	0	0	0.07	0.03	FAM131B	family with sequence similarity 131, member B
ENSG00000122711.8	3.39083	-2.0763	1.66769e-05	0.00275323	0.07	0	0.3	0.57	SPINK4	serine peptidase inhibitor, Kazal type 4
ENSG00000274995.1	5.70759	-2.77049	0.000286343	0.0177581	0	0	0.21	0.23	RP11-321F6.2		--
ENSG00000146677.7	-1.282	0.434749	1.04246e-06	0.000338337	3.45	4.4	1.78	1.42	AC004453.8		--
ENSG00000248866.1	1.28074	-0.686734	0.000852238	0.0373325	0.18	0.37	0.6	0.71	USP46-AS1	USP46 antisense RNA 1
ENSG00000168542.12	-3.34232	-2.16302	5.2645e-05	0.00580538	0.07	0.03	0	0.01	COL3A1	collagen, type III, alpha 1
ENSG00000179603.17	-6.13427	-2.51522	1.03982e-05	0.00191603	0.01	0.09	0	0	GRM8	glutamate receptor, metabotropic 8
ENSG00000012779.10	-1.48912	-0.78646	0.000141618	0.0114378	0.27	0.25	0.08	0.11	ALOX5	arachidonate 5-lipoxygenase
ENSG00000234473.1	1.88326	-1.60828	0.000487101	0.0255268	0.11	0.04	0.45	0.15	ZNF101P2	zinc finger protein 101 pseudogene 2
ENSG00000206559.7	2.13396	-1.77158	0.00031002	0.0183323	0.04	0.04	0.07	0.31	ZCWPW2	zinc finger, CW type with PWWP domain 2
ENSG00000198400.11	1.63863	-1.2792	0.000393394	0.0215657	0.03	0.07	0.21	0.1	NTRK1	neurotrophic tyrosine kinase, receptor, type 1
ENSG00000237399.7	1.82431	-1.0565	3.54026e-05	0.00466881	0.06	0.02	0.1	0.18	PITRM1-AS1	PITRM1 antisense RNA 1
ENSG00000228677.1	-5.50894	-2.91562	0.00109327	0.0431463	0.24	0	0	0	TTC3-AS1	TTC3 antisense RNA 1
ENSG00000237451.3	5.47221	-2.9145	0.00109327	0.0431463	0	0	0.53	0.19	CDK2AP2P2	cyclin-dependent kinase 2 associated protein 2 pseudogene 2
ENSG00000133020.4	-2.17478	-0.673114	5.83253e-08	3.33166e-05	0.19	0.07	0.02	0.04	MYH8	myosin, heavy chain 8, skeletal muscle, perinatal
ENSG00000270061.1	2.01883	-1.67019	0.000316595	0.0186438	0.07	0.43	1.16	0.85	RP11-214K3.19		--
ENSG00000259288.5	-1.32974	1.43609	1.85072e-10	3.10933e-07	1	0.69	0.24	0.43	PAK6	p21 protein (Cdc42/Rac)-activated kinase 6
ENSG00000272030.1	-1.86408	-1.67119	0.00114868	0.0440959	0.56	0.28	0.09	0.14	RP1-178F15.4		--
ENSG00000215244.2	-1.38345	-0.990959	0.000921268	0.0394488	0.17	0.19	0.07	0.07	RP11-563J2.2		--
ENSG00000279491.1	-1.6604	-0.545435	2.96183e-06	0.000748609	0.46	0.53	0.11	0.19	RP11-810P12.7		--
ENSG00000214401.4	2.48642	-1.73832	4.05726e-05	0.00510481	0.18	0	0.29	0.77	KANSL1-AS1	KANSL1 antisense RNA 1
ENSG00000243370.3	-5.51221	-2.91399	0.00109327	0.0431463	0.42	0.38	0	0	RN7SL775P	RNA, 7SL, cytoplasmic 775, pseudogene
ENSG00000168135.4	-2.35723	-1.49209	1.98416e-05	0.00312064	0.33	0.09	0.01	0.07	KCNJ4	potassium channel, inwardly rectifying subfamily J, member 4
ENSG00000213312.3	-5.85114	-2.70348	0.000146972	0.0114378	0.32	0.1	0	0	RPL7AP34	ribosomal protein L7a pseudogene 34
ENSG00000225756.1	-3.44982	-1.32959	3.95464e-09	3.76495e-06	0.32	0.19	0.01	0.03	DBH-AS1	DBH antisense RNA 1
ENSG00000178772.6	5.59369	-2.84121	0.000558963	0.0276203	0	0	0.02	0.08	CPN2	carboxypeptidase N, polypeptide 2
ENSG00000279122.1	5.81305	-2.70315	0.000146972	0.0114378	0	0	0.17	0.09	RP11-394B2.3		--
ENSG00000250950.1	-1.53468	-1.30249	0.00112118	0.0440467	0.66	0.94	0.21	0.32	RP11-33B1.3		--
ENSG00000277662.1	-2.12356	-1.35521	3.54726e-05	0.00466881	1.18	0.72	0.19	0.23	RP11-74J13.9		--
ENSG00000254400.1	-3.65111	-2.57429	0.00034038	0.0194479	0	0.96	0	0.06	RP11-732A19.8		--
ENSG00000240057.5	2.13397	-1.77025	0.00031002	0.0183323	0.01	0.07	0.15	0.19	RP11-572M11.4		--
ENSG00000082684.14	1.97138	-1.70334	0.000496504	0.025783	0.01	0.02	0.07	0.06	SEMA5B	sema domain, seven thrombospondin repeats (type 1 and type 1-like), transmembrane domain (TM) and short cytoplasmic domain, (semaphorin) 5B
ENSG00000237339.5	-2.51406	-1.771	6.68154e-05	0.00693932	0.2	0.07	0.04	0.01	LINC01502	long intergenic non-protein coding RNA 1502
ENSG00000254454.2	5.47077	-2.91523	0.00109327	0.0431463	0	0	0.02	0.15	RCC2P6	regulator of chromosome condensation 2 pseudogene 6
ENSG00000232716.2	1.84652	-1.48957	0.000307963	0.0183323	0.03	0.1	0.28	0.19	AC016831.6		--
ENSG00000228817.4	-1.03664	-0.232244	0.000904445	0.0391392	0.89	0.7	0.17	0.6	BACH1-IT2	BACH1 intronic transcript 2
ENSG00000272515.1	3.26785	-2.16309	5.2645e-05	0.00580538	0.04	0	0.24	0.16	RP11-29P20.1		--
ENSG00000164972.12	3.5711	-2.57781	0.000625159	0.0299583	0	0.02	0.11	0.16	C9orf24	chromosome 9 open reading frame 24
ENSG00000231683.6	-3.27415	-2.20956	9.33425e-05	0.00854473	0.12	0.02	0.01	0.01	RP1-27K12.2		--
ENSG00000127129.9	-1.07291	0.817	7.11404e-06	0.00144549	2.16	1.05	0.74	0.79	EDN2	endothelin 2
ENSG00000135324.5	2.00018	-1.25488	5.51896e-05	0.00594819	0.01	0.11	0.27	0.19	MRAP2	melanocortin 2 receptor accessory protein 2
ENSG00000047936.10	-5.84985	-2.70413	0.000146972	0.0114378	0.04	0	0	0	ROS1	ROS proto-oncogene 1 , receptor tyrosine kinase
ENSG00000235454.1	3.97953	-2.30596	2.96451e-05	0.00411061	0.02	0	0.04	0.38	HAUS6P3	HAUS augmin-like complex, subunit 6 pseudogene 3
ENSG00000279319.1	5.47242	-2.91439	0.00109327	0.0431463	0	0	0.07	0.02	RP11-693M3.1		--
ENSG00000278677.1	-1.13926	1.30666	7.51197e-08	4.0481e-05	7.88	6.79	3.01	3.61	HIST1H2AM	histone cluster 1, H2am
ENSG00000223685.5	4.11788	-2.20785	8.73051e-06	0.00169627	0	0.03	0.46	0.07	LINC00571	long intergenic non-protein coding RNA 571
ENSG00000213740.2	8.09479	3.36146	9.93265e-160	1.41843e-155	0.08	0.02	17.13	13.01	SERBP1P1	SERPINE1 mRNA binding protein 1 pseudogene 1
ENSG00000228395.1	1.45831	-0.751789	0.000180125	0.0130572	0.13	0.27	0.82	0.28	RP11-216B9.6		--
ENSG00000137507.11	-1.13893	-0.395545	0.000653689	0.0308086	0.24	0.13	0.08	0.09	LRRC32	leucine rich repeat containing 32
ENSG00000198691.11	-2.27152	-1.73227	0.000120554	0.0103398	0.02	0.08	0.02	0	ABCA4	ATP-binding cassette, sub-family A (ABC1), member 4
ENSG00000134121.9	-1.25779	-0.545898	0.0002772	0.0177581	0.09	0.1	0.03	0.05	CHL1	cell adhesion molecule L1-like
ENSG00000137709.9	-1.27281	-0.535374	0.0002772	0.0177581	0.35	0.15	0.08	0.13	POU2F3	POU class 2 homeobox 3
ENSG00000270179.1	5.91077	-2.63911	7.55825e-05	0.00721977	0	0	0.34	0.22	RP11-159N11.4		--
ENSG00000250616.2	-2.51812	-1.76872	6.68154e-05	0.00693932	0.21	0.22	0.07	0	RP11-455F5.3		--
ENSG00000124116.18	1.09041	0.0560433	0.000178714	0.0130544	0.39	0.61	0.89	1.21	WFDC3	WAP four-disulfide core domain 3
ENSG00000238290.1	-1.34616	-0.754876	0.000584545	0.0285877	0.47	0.18	0.17	0.09	RP11-431K24.1		--
ENSG00000279576.1	3.50711	-1.99155	5.26162e-06	0.00120222	0	0.03	0.4	0	MALAT1	metastasis associated lung adenocarcinoma transcript 1 (non-protein coding)
ENSG00000124678.17	5.91057	-2.63921	7.55825e-05	0.00721977	0	0	0.07	0.06	TCP11	t-complex 11, testis-specific
ENSG00000100346.17	3.05944	-2.30475	0.00029183	0.0178862	0	0	0.03	0.01	CACNA1I	calcium channel, voltage-dependent, T type, alpha 1I subunit
ENSG00000261663.1	3.13043	-2.2556	0.000165215	0.0122883	0	0.07	0.34	0.27	RP11-304L19.11		--
ENSG00000166501.12	-2.74644	-1.60678	5.39338e-06	0.00120344	0.05	0.05	0	0.01	PRKCB	protein kinase C, beta
ENSG00000168491.9	-5.51482	-2.91269	0.00109327	0.0431463	0.02	0.08	0	0	CCDC110	coiled-coil domain containing 110
ENSG00000128536.15	-1.41925	-0.0527336	2.74279e-06	0.000718686	0.32	0.28	0.1	0.13	CDHR3	cadherin-related family member 3
ENSG00000170959.14	-2.67625	-1.25744	2.67617e-07	0.000119428	0.1	0.03	0.01	0.01	DCDC1	doublecortin domain containing 1
ENSG00000271646.1	-1.06096	-0.364602	0.00113743	0.0440959	0.27	0.41	0.16	0.16	RP11-326I11.3		--
ENSG00000182165.17	-1.02781	0.188888	0.000192898	0.0138426	1.21	1.46	0.48	0.81	TP53TG1	TP53 target 1 (non-protein coding)
ENSG00000231638.1	4.17982	-2.16285	4.73828e-06	0.00110964	0	0.01	0.1	0.09	AC011738.4		--
ENSG00000225483.1	-5.7445	-2.77145	0.000286343	0.0177581	0.78	0	0	0	RP11-38J22.2		--
ENSG00000258303.1	5.70759	-2.77049	0.000286343	0.0177581	0	0	0.19	0.21	RP11-887P2.6		--
ENSG00000204584.1	1.49054	-0.607646	4.40066e-05	0.00534839	0.12	0.13	0.52	0.21	RP11-304F15.3		--
ENSG00000238120.1	1.17029	-0.506341	0.00070693	0.0326709	0.86	0.37	1.59	1.23	LINC01589	long intergenic non-protein coding RNA 1589
ENSG00000261371.5	-1.68021	-1.11532	0.000159564	0.0120564	0.06	0.1	0.01	0.04	PECAM1	platelet/endothelial cell adhesion molecule 1
ENSG00000272789.1	1.25862	-0.823023	0.00122502	0.0459052	0.33	0.27	0.94	0.52	RP11-286H15.1		--
ENSG00000273062.1	-2.41735	-1.83929	0.000179683	0.0130572	0.15	0.18	0.01	0.05	RP11-428K3.1		--
ENSG00000241764.3	1.37172	-1.09651	0.0011564	0.04431	0.29	0.31	0.96	0.6	AC002467.7		--
ENSG00000101076.16	-1.0368	2.59585	8.06777e-10	1.04738e-06	1.04	0.9	0.41	0.53	HNF4A	hepatocyte nuclear factor 4, alpha
ENSG00000267665.1	5.47242	-2.91439	0.00109327	0.0431463	0	0	0.05	0.01	RP11-13K12.2		--
ENSG00000279442.1	1.97318	-1.70437	0.000496504	0.025783	0.02	0	0.05	0.06	LA16c-60D12.2		--
ENSG00000269952.1	2.13073	-0.934806	8.48803e-07	0.000295642	0.35	0.54	1.73	2.15	RP11-324I22.3		--
ENSG00000263590.2	1.47829	-0.34293	1.47588e-05	0.00253932	0.05	0.08	0.17	0.18	RP11-403I13.7		--
ENSG00000265728.1	3.05916	-2.30422	0.00029183	0.0178862	0.03	0.03	0.45	0.08	RP11-883A18.3		--
ENSG00000271751.1	-3.27688	-2.20839	9.33425e-05	0.00854473	0.79	0.43	0	0.11	RP11-110I1.14		--
ENSG00000224965.1	5.59493	-2.84058	0.000558963	0.0276203	0	0	0.26	0.12	KCNC4-AS1	KCNC4 antisense RNA 1 (head to head)
ENSG00000258365.1	1.35174	-0.639778	0.000343813	0.0196001	0.17	0.34	0.41	0.87	RP11-1105G2.3		--
ENSG00000178568.13	-1.45761	-0.806259	0.000275877	0.0177581	0.07	0.03	0.02	0.02	ERBB4	erb-b2 receptor tyrosine kinase 4
ENSG00000280163.1	2.47219	-1.99241	0.000264154	0.0171856	0.01	0.05	0.22	0.12	CTC-277H1.6		--
ENSG00000164089.8	-1.82602	-1.43287	0.000296518	0.0180189	0.17	0.24	0	0.11	ETNPPL	ethanolamine-phosphate phospho-lyase
ENSG00000103034.14	-1.51826	-1.05268	0.00057824	0.0284253	0.12	0.12	0.05	0.04	NDRG4	NDRG family member 4
ENSG00000253476.1	-1.53012	-0.576276	1.60333e-05	0.00270289	1.56	1.46	0.41	0.62	RP11-395I14.2		--
ENSG00000176945.16	-5.75163	-2.76789	0.000286343	0.0177581	0.01	0.08	0	0	MUC20	mucin 20, cell surface associated
ENSG00000235387.1	1.4018	-0.607456	0.000185107	0.013317	0.13	0.22	0.57	0.36	LINC00961	long intergenic non-protein coding RNA 961
ENSG00000176907.4	-1.41442	0.523869	5.17201e-08	3.14293e-05	1.06	0.82	0.2	0.5	C8orf4	chromosome 8 open reading frame 4
ENSG00000266010.1	-1.6935	-0.934477	6.67353e-05	0.00693932	0.45	0.23	0.12	0.09	GATA6-AS1	GATA6 antisense RNA 1 (head to head)
ENSG00000203721.5	3.47568	-2.63861	0.00114643	0.0440959	0.02	0	0.24	0	LINC00862	long intergenic non-protein coding RNA 862
ENSG00000280890.1	1.74273	-1.43548	0.000446922	0.0237701	0.06	0.03	0.16	0.12	ELDR	EGFR long non-coding downstream RNA
ENSG00000165140.9	-1.26736	-0.491169	0.000249102	0.016469	0.61	0.35	0.14	0.25	FBP1	fructose-1,6-bisphosphatase 1
ENSG00000198771.10	5.59369	-2.84121	0.000558963	0.0276203	0	0	0.02	0.07	RCSD1	RCSD domain containing 1
ENSG00000163395.16	1.0236	1.37929	1.07027e-06	0.000340268	0.07	0.18	0.26	0.24	IGFN1	immunoglobulin-like and fibronectin type III domain containing 1
ENSG00000279140.1	-2.67539	-2.20964	0.000644364	0.0305487	1.31	0.25	0	0.23	RP11-477I4.4		--
ENSG00000254988.1	-2.74612	-2.16279	0.000378225	0.0211636	0.62	0.27	0.09	0.04	CTD-2547H18.1		--
ENSG00000273352.1	1.23285	-0.368422	0.000286631	0.0177581	0.41	0.58	1.16	1.14	RP11-61L19.3		--
ENSG00000272910.1	-2.60344	-2.25599	0.00109373	0.0431463	0.66	0.26	0.1	0.05	RP11-15L13.4		--
ENSG00000119922.8	1.15728	3.44068	7.93662e-14	1.88898e-10	1.74	1.57	3.53	3.82	IFIT2	interferon-induced protein with tetratricopeptide repeats 2
ENSG00000278996.1	-2.59079	0.3892	1.69576e-18	6.05409e-15	0.7	0.8	0.05	0.2	CH507-513H4.1		--
ENSG00000213519.2	3.66321	-2.51869	0.00034038	0.0194479	0	0.09	0.76	0.57	AC132008.1		--
ENSG00000111181.12	-1.04106	1.58638	2.00285e-07	9.5339e-05	1.27	0.52	0.52	0.35	SLC6A12	solute carrier family 6 (neurotransmitter transporter), member 12
ENSG00000142864.14	4.30813	12.3941	7.91167e-178	2.25965e-173	66.08	66.65	1393.77	1223.63	SERBP1	SERPINE1 mRNA binding protein 1
ENSG00000144583.4	1.493	0.895166	4.3246e-10	6.17574e-07	0.12	0.25	0.71	0.32	2022-03-04	membrane-associated ring finger (C3HC4) 4, E3 ubiquitin protein ligase
ENSG00000259687.1	-3.98215	-2.35429	5.46151e-05	0.00590856	0.33	0.32	0	0.03	LINC01220	long intergenic non-protein coding RNA 1220
ENSG00000259762.1	5.59534	-2.84037	0.000558963	0.0276203	0	0	0.49	0.09	RP11-158M2.4		--
ENSG00000258545.5	-1.59851	-1.35856	0.00123882	0.0460703	0.37	0.04	0.03	0.1	RHOXF1-AS1	RHOXF1 antisense RNA 1
ENSG00000254338.1	-1.32398	-0.656805	0.000280363	0.0177581	2.42	0.98	0.58	0.78	MAFA-AS1	MAFA antisense RNA 1
ENSG00000158516.11	2.9006	-2.40808	0.000903606	0.0391392	0.03	0	0.18	0.12	CPA2	carboxypeptidase A2 (pancreatic)
ENSG00000167850.3	2.11308	-1.60915	0.000127313	0.0106946	0.08	0.03	0.22	0.28	CD300C	CD300c molecule
ENSG00000270104.1	3.47568	-2.63861	0.00114643	0.0440959	0.04	0	0.59	0	RP11-245P10.6		--
ENSG00000196388.8	-1.14979	0.159478	4.37841e-05	0.00534409	0.94	0.69	0.34	0.39	INCA1	inhibitor of CDK, cyclin A1 interacting protein 1
ENSG00000104833.10	-1.11993	2.03698	1.0243e-09	1.27195e-06	1.91	1.73	0.68	0.98	TUBB4A	tubulin, beta 4A class IVa
ENSG00000167861.15	-1.12343	-0.490867	0.00109196	0.0431463	0.3	0.17	0.12	0.1	HID1	HID1 domain containing
ENSG00000229267.2	1.82112	-1.3821	0.000196016	0.0140083	0.07	0.05	0.23	0.23	AC072062.1		--
ENSG00000279128.1	1.07617	0.0739135	0.000204237	0.0141207	0.29	0.27	0.5	0.67	RP11-76C10.4		--
ENSG00000277087.1	-6.36721	-2.35079	1.45501e-06	0.000431112	0	0.99	0	0	RP5-1116H23.6		--
ENSG00000276434.1	1.86988	-1.7707	0.00120586	0.0454959	0.18	0.15	0.66	0.59	RP11-391H12.8		--
ENSG00000259498.1	-5.63414	-2.84043	0.000558963	0.0276203	0.06	0.03	0	0	RP11-244F12.3		--
ENSG00000225192.1	5.70678	-2.77091	0.000286343	0.0177581	0	0	0.03	0.14	ZNF33BP1	zinc finger protein 33B pseudogene 1
ENSG00000181856.14	-1.33422	1.30274	3.32964e-10	5.00515e-07	0.9	0.6	0.14	0.45	SLC2A4	solute carrier family 2 (facilitated glucose transporter), member 4
ENSG00000237280.1	5.47097	-2.91513	0.00109327	0.0431463	0	0	0.07	0.3	RP11-96C23.9		--
ENSG00000231595.1	1.14953	-0.382173	0.000497841	0.0258055	0.27	0.22	0.63	0.47	AC005224.2		--
ENSG00000214544.7	1.3262	-0.219936	4.3203e-05	0.0052958	0.09	0.13	0.33	0.23	GTF2IRD2P1	GTF2I repeat domain containing 2 pseudogene 1
ENSG00000254595.1	1.8346	-1.2566	8.33832e-05	0.00779608	0.24	0.15	0.78	0.64	CTD-2010I16.1		--
ENSG00000221947.7	1.49996	-1.01328	0.000406686	0.0221667	0.06	0.05	0.21	0.13	XKR9	XK, Kell blood group complex subunit-related family, member 9
ENSG00000170345.9	-1.15391	6.86808	2.0113e-17	6.38276e-14	56.46	38.57	22.16	20.26	FOS	FBJ murine osteosarcoma viral oncogene homolog
ENSG00000151468.10	1.45534	-0.897658	0.000238291	0.0160515	0.11	0.01	0.24	0.09	CCDC3	coiled-coil domain containing 3
ENSG00000213152.5	2.2814	-2.11798	0.00120215	0.0454959	0.03	0.1	0.37	0.26	RPL7AP60	ribosomal protein L7a pseudogene 60
ENSG00000260236.1	-1.44818	-0.419855	1.70624e-05	0.00278468	0.48	0.44	0.13	0.21	RP11-708J19.1		--
ENSG00000149582.15	1.73935	-1.43595	0.000671004	0.0312723	0.03	0.03	0.05	0.15	TMEM25	transmembrane protein 25
ENSG00000272663.1	-6.1266	-2.51907	2.01043e-05	0.00312064	0.55	0.18	0	0	RP11-191L17.1		--
ENSG00000120068.6	1.24551	-0.771369	0.00108449	0.0431463	0.17	0.13	0.36	0.34	HOXB8	homeobox B8
ENSG00000267395.5	2.83858	-1.73667	6.9367e-06	0.00142997	0.05	0.05	0.42	0.29	AC074212.6		--
ENSG00000227051.5	-1.40632	-0.0237184	3.43745e-06	0.000861201	0.18	0.11	0.05	0.06	C14orf132	chromosome 14 open reading frame 132
ENSG00000224637.1	-3.34044	-2.16397	5.2645e-05	0.00580538	0.66	0.11	0	0.07	PDSS1P2	prenyl (decaprenyl) diphosphate synthase, subunit 1 pseudogene 2
ENSG00000232070.8	-2.1899	-1.99042	0.00124578	0.0460889	0.12	0.25	0.03	0.05	TMEM253	transmembrane protein 253
ENSG00000277152.1	2.3176	-1.46198	3.39891e-05	0.00455757	0	0.03	0.06	0.07	RP11-622C24.2		--
ENSG00000253463.1	-2.74279	-2.16489	0.000378225	0.0211636	0.85	0	0	0.12	HMGB1P19	high mobility group box 1 pseudogene 19
ENSG00000216901.1	5.5939	-2.84111	0.000558963	0.0276203	0	0	0.15	0.43	AL022393.7		--
ENSG00000112599.8	3.47419	-2.63871	0.00114643	0.0440959	0	0.02	0.22	0.08	GUCA1B	guanylate cyclase activator 1B (retina)
ENSG00000158683.7	1.58628	-0.952446	0.00026089	0.0170776	0.01	0.03	0.08	0.05	PKD1L1	polycystic kidney disease 1 like 1
ENSG00000235111.1	1.81889	-1.05297	7.44933e-05	0.00721977	0	0.11	0.19	0.2	RP1-29C18.8		--
ENSG00000177238.13	2.32749	-1.64048	4.62912e-05	0.00544338	0.01	0	0.04	0.05	TRIM72	tripartite motif containing 72, E3 ubiquitin protein ligase
ENSG00000125740.13	-1.00016	5.73695	3.79356e-13	8.33445e-10	13.16	9.01	6	5.01	FOSB	FBJ murine osteosarcoma viral oncogene homolog B
ENSG00000233974.3	5.81264	-2.70336	0.000146972	0.0114378	0	0	0.06	0.06	RP11-823P9.3		--
ENSG00000273265.1	2.10591	-1.99222	0.00124578	0.0460889	0.06	0.25	0.82	0.5	RP11-353K11.1		--
